# Supplementary material for: Substituent and redox effects on the second-order NLO response of Ru(ii) complexes with polypyridine ligands: a theoretical study
Source: Royal Society of Chemistry journal article supplement (doi:10.1039/d3nj00594a), 2023-01-01
Supplement: d3nj00594a1.pdf [file d3nj00594a1.pdf]

## Supporting Information

### **Substituent and redox effects on the second-order NLO response of Ru(II) complexes with polypyridine ligands: A theoretical study**

Yingying Wang, Yu Chen, Yuanyuan Zhao,<sup>\*</sup> and Yongqing Qiu<sup>\*</sup>

Institute of Functional Material Chemistry, Faculty of Chemistry, Northeast Normal  
University, Changchun, 130024, China

---

<sup>\*</sup>Corresponding Author. Fax: +86043185099291  
E-mail addresses: [yuanyuan-zhao@outlook.com](mailto:yuanyuan-zhao@outlook.com) (Y. Y. Zhao)  
<sup>\*</sup>Corresponding Author. Fax: +86043185098768.  
E-mail addresses: [qiuyq466@nenu.edu.cn](mailto:qiuyq466@nenu.edu.cn) (Y. Q. Qiu)

## General Comments

**Table S1** Electronic Energy (kJ/mol) calculated in two spin states of complexes 1-4 at the B3LYP/6-31G(d)/LANL2DZ level of theory.

**Table S2** Total first hyperpolarizabilities  $\beta_{\text{tot}}$  (a.u.) of all studied complexes calculated with two methods.

**Fig.S1** Spin density diagrams for one-electron reduced and oxidized species of complexes 1-4.

**Fig.S2** Simulated absorption spectra of complex 1 in acetonitrile solution by four functionals.

**Fig.S3** Molecular orbitals involved in crucial electronic transitions of complexes 1,  $1^+$  and  $1^-$ .

**Fig.S4** Molecular orbitals involved in crucial electronic transitions of complexes 2,  $2^+$  and  $2^-$ .

**Fig.S5** Molecular orbitals involved in crucial electronic transitions of complexes 3,  $3^+$  and  $3^-$ .

**Fig.S6** Molecular orbitals involved in crucial electronic transitions of complexes 4,  $4^+$  and  $4^-$ .

**Table S1** Electronic Energy (kJ/mol) calculated in two spin states of complexes 1-4 at the B3LYP/6-31G(d)/LANL2DZ level of theory.

| Single electron | 1     | 2     | 3     | 4      |
|-----------------|-------|-------|-------|--------|
| S=0             | 0.0   | 0.0   | 0.0   | 0.0    |
| S=4             | 427.0 | 488.2 | 437.8 | 1001.3 |

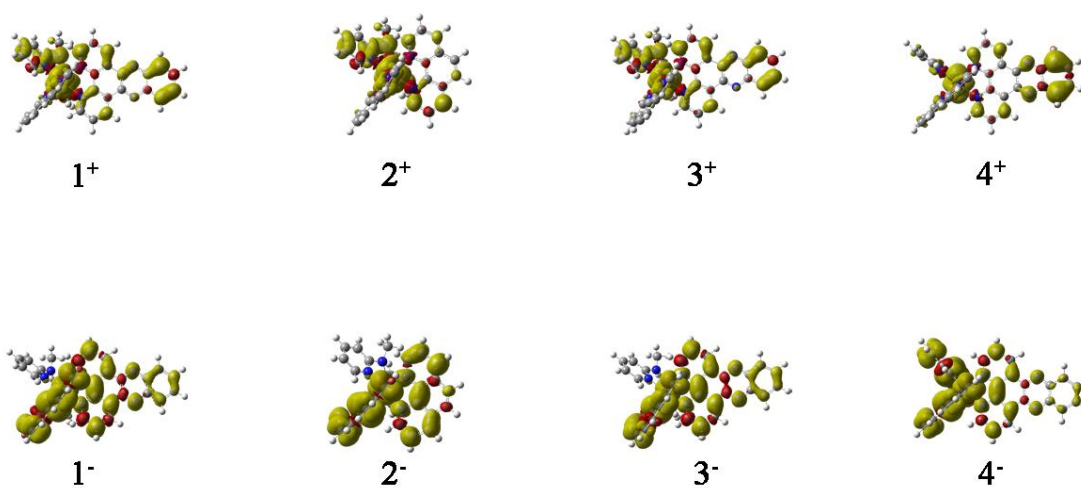

**Fig.S1** Spin density diagrams for one-electron reduced and oxidized species of complexes 1–4.

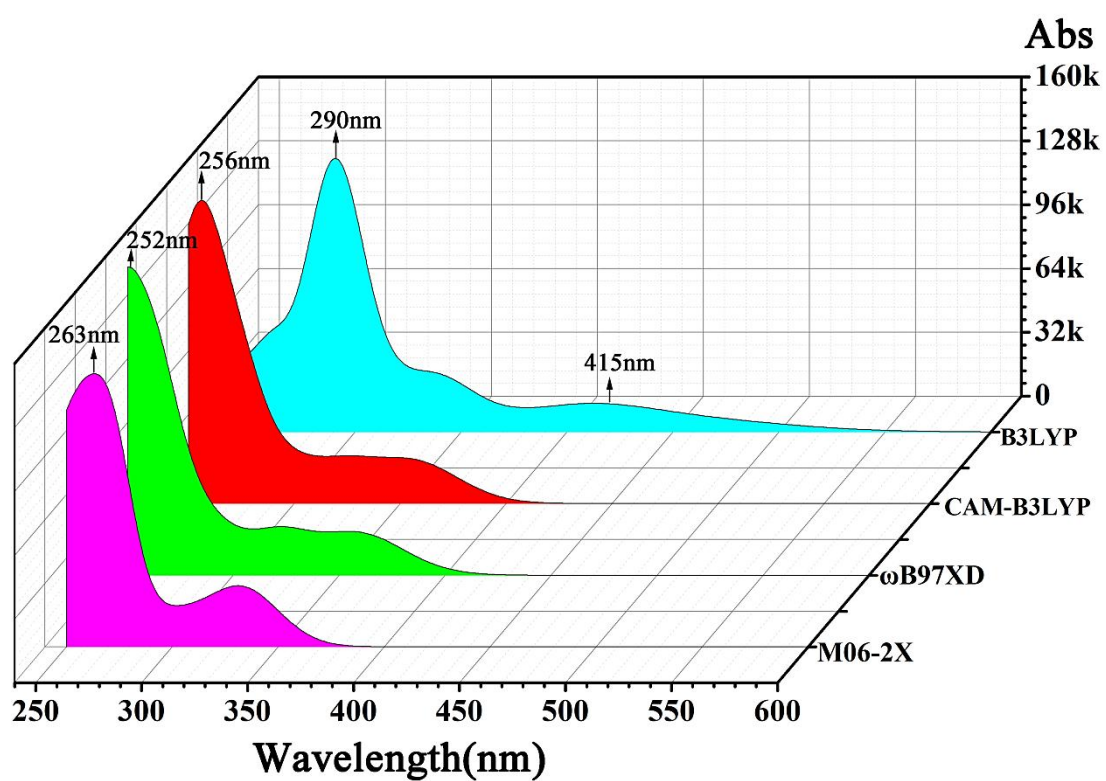

Fig.S2 Simulated absorption spectra of complex 1 in acetonitrile solution by four functionals.

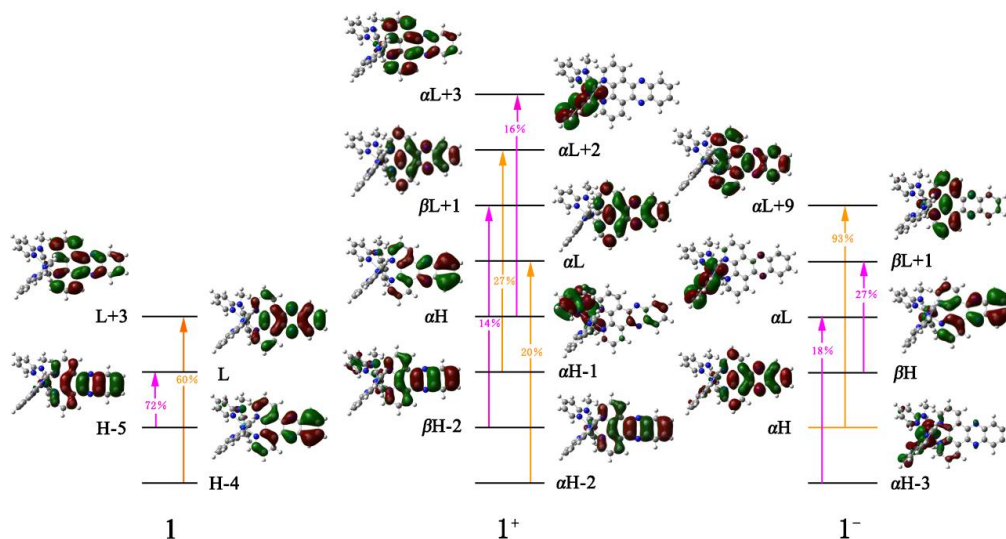

Fig.S3 Molecular orbitals involved in crucial electronic transitions of complexes 1, 1<sup>+</sup>, and 1<sup>-</sup>.

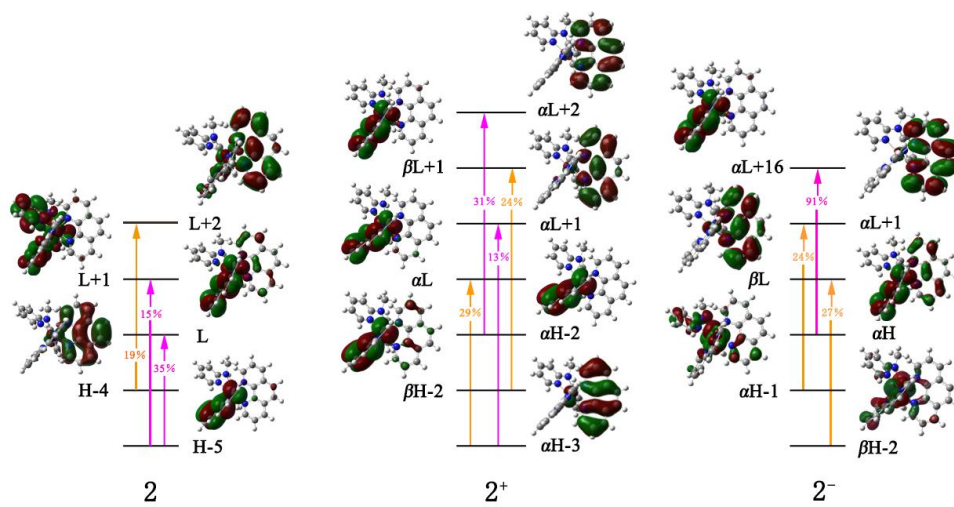

Fig.S4 Molecular orbitals involved in crucial electronic transitions of complexes 2, 2<sup>+</sup>, and 2<sup>-</sup>.

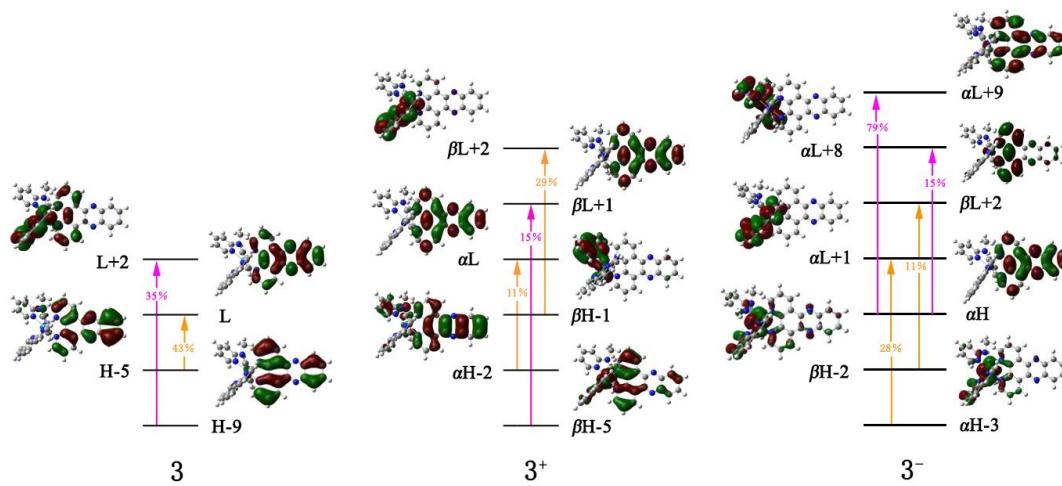

Fig.S5 Molecular orbitals involved in crucial electronic transitions of complexes 3, 3<sup>+</sup>, and 3<sup>-</sup>.

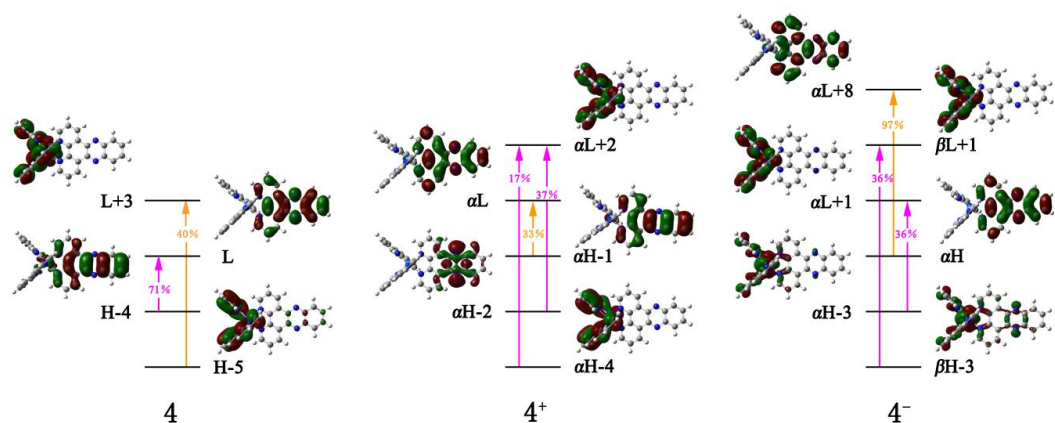

**Fig.S6** Molecular orbitals involved in crucial electronic transitions of complexes 4, 4<sup>+</sup>, and 4<sup>-</sup>.

**Table S2** Total first hyperpolarizabilities  $\beta_{\text{tot}}$  (a.u.) of all studied complexes calculated with two methods.

| Complex        | method         | $\beta_{\text{tot}}$ | Complex        | method         | $\beta_{\text{tot}}$ |
|----------------|----------------|----------------------|----------------|----------------|----------------------|
| 1 <sup>+</sup> | CAM-B3LYP      | $6.24 \times 10^3$   | 3 <sup>+</sup> | CAM-B3LYP      | $4.36 \times 10^3$   |
|                | $\omega$ B97XD | $6.83 \times 10^3$   |                | $\omega$ B97XD | $6.18 \times 10^3$   |
| 1              | CAM-B3LYP      | $1.79 \times 10^3$   | 3              | CAM-B3LYP      | $1.67 \times 10^3$   |
|                | $\omega$ B97XD | $1.76 \times 10^3$   |                | $\omega$ B97XD | $1.65 \times 10^3$   |
| 1 <sup>-</sup> | CAM-B3LYP      | $1.44 \times 10^5$   | 3 <sup>-</sup> | CAM-B3LYP      | $1.89 \times 10^5$   |
|                | $\omega$ B97XD | $1.09 \times 10^5$   |                | $\omega$ B97XD | $1.58 \times 10^5$   |
| 2 <sup>+</sup> | CAM-B3LYP      | $4.75 \times 10^3$   | 4 <sup>+</sup> | CAM-B3LYP      | $3.12 \times 10^3$   |
|                | $\omega$ B97XD | $5.54 \times 10^3$   |                | $\omega$ B97XD | $2.92 \times 10^3$   |
| 2              | CAM-B3LYP      | $1.53 \times 10^3$   | 4              | CAM-B3LYP      | $1.02 \times 10^3$   |
|                | $\omega$ B97XD | $1.57 \times 10^3$   |                | $\omega$ B97XD | $8.36 \times 10^2$   |
| 2 <sup>-</sup> | CAM-B3LYP      | $9.15 \times 10^3$   | 4 <sup>-</sup> | CAM-B3LYP      | $5.36 \times 10^5$   |
|                | $\omega$ B97XD | $6.52 \times 10^3$   |                | $\omega$ B97XD | $1.05 \times 10^5$   |
